# Comparative Genome Analysis of the High Pathogenicity *Salmonella* Typhimurium Strain UK-1

Yingqin Luo<sup>1,2</sup>, Qingke Kong<sup>1</sup>, Jiseon Yang<sup>1</sup>, Arindam Mitra<sup>1</sup>, Greg Golden<sup>1</sup>, Soo-Young Wanda<sup>1</sup>, Kenneth L. Roland<sup>1</sup>, Roderick V. Jensen<sup>3</sup>, Peter B. Ernst<sup>4</sup>, Roy Curtiss, III<sup>1\*</sup>

**1** Center for Infectious Diseases and Vaccinology, The Biodesign Institute, Arizona State University, Tempe, Arizona, United States of America, **2** Center for Evolutionary Medicine and Informatics, The Biodesign Institute, Arizona State University, Tempe, Arizona, United States of America, **3** Department of Biological Sciences, Virginia Polytechnic Institute and State University, Blacksburg, Virginia, United States of America, **4** Department of Medicine, Division of Gastroenterology and Hepatology, University of Virginia, Charlottesville, Virginia, United States of America

## Abstract

*Salmonella enterica* serovar Typhimurium, a gram-negative facultative rod-shaped bacterium causing salmonellosis and foodborne disease, is one of the most common isolated *Salmonella* serovars in both developed and developing nations. Several *S. Typhimurium* genomes have been completed and many more genome-sequencing projects are underway. Comparative genome analysis of the multiple strains leads to a better understanding of the evolution of *S. Typhimurium* and its pathogenesis. *S. Typhimurium* strain UK-1 (belongs to phage type 1) is highly virulent when orally administered to mice and chickens and efficiently colonizes lymphoid tissues of these species. These characteristics make this strain a good choice for use in vaccine development. In fact, UK-1 has been used as the parent strain for a number of nonrecombinant and recombinant vaccine strains, including several commercial vaccines for poultry. In this study, we conducted a thorough comparative genome analysis of the UK-1 strain with other *S. Typhimurium* strains and examined the phenotypic impact of several genomic differences. Whole genomic comparison highlights an extremely close relationship between the UK-1 strain and other *S. Typhimurium* strains; however, many interesting genetic and genomic variations specific to UK-1 were explored. In particular, the deletion of a UK-1-specific gene that is highly similar to the gene encoding the T3SS effector protein NleC exhibited a significant decrease in oral virulence in BALB/c mice. The complete genetic complements in UK-1, especially those elements that contribute to virulence or aid in determining the diversity within bacterial species, provide key information in evaluating the functional characterization of important genetic determinants and for development of vaccines.

**Citation:** Luo Y, Kong Q, Yang J, Mitra A, Golden G, et al. (2012) Comparative Genome Analysis of the High Pathogenicity *Salmonella* Typhimurium Strain UK-1. PLoS ONE 7(7): e40645. doi:10.1371/journal.pone.0040645

**Editor:** Jean-Pierre Gorvel, Universite de la Mediterranee, France

**Received:** July 26, 2011; **Accepted:** June 13, 2012; **Published:** July 6, 2012

**Copyright:** © 2012 Luo et al. This is an open-access article distributed under the terms of the Creative Commons Attribution License, which permits unrestricted use, distribution, and reproduction in any medium, provided the original author and source are credited.

**Funding:** This work was supported by National Institutes of Health/National Institute of Allergy and Infectious Diseases grants AI060557, AI08600 and AI070491, and the Bill and Melinda Gates Foundation grant 37863. The funders had no role in study design, data collection and analysis, decision to publish, or preparation of the manuscript.

**Competing Interests:** The authors have declared that no competing interests exist.

\* E-mail: rcurtiss@asu.edu

## Introduction

Members of the bacterial genus *Salmonella* are among the major pathogens that cause infections in humans and almost all known animals. *Salmonella enterica* serovar Typhimurium is a principal cause of food-related illness (16% of salmonellosis infections a year in the United States) [1]. Most nontyphoidal salmonellae (NTS) *Salmonella* infections among healthy adults are associated with gastroenteritis that resolves without treatment and associated with case fatality rate <1% [2]. Recently, invasive NTS have been associated with life-threatening systemic infections in sub-Saharan Africa and in susceptible populations, such as in adults with advanced HIV disease, and susceptible children [3,4].

*S. Typhimurium* is an invasive enteric pathogen that is remarkably adaptable to diverse hosts including humans, poultry, rodents, cattle, sheep and horses. More than 200 different *S. Typhimurium* strains have been identified, which are principally adapted to niches in the environment and the intestines of different animal species [5]. Although the genome content of *S. Typhimurium* strains is extremely similar [6], different combinations of

fitness factor-encoding mobile genetic elements and phages have been observed [7]. *S. Typhimurium* has been used extensively in the investigation of *Salmonella* pathogenicity and for recombinant vaccine development [8,9,10].

*S. Typhimurium* strain UK-1, a phage type 1 strain, is a chicken-passaged isolate of a highly virulent *S. Typhimurium* strain originally isolated from an infected horse in 1991 [9]. UK-1 is not only highly invasive and virulent for chickens and mice, but is also capable of lethal infections in calves, pigs and horses [11,12]. Because of the high virulence of UK-1, attenuated derivatives of the UK-1 strain are expected to induce a higher level of protective immunity after oral administration than the attenuated derivatives of less virulent *S. Typhimurium* strains [12]. For example, in one study, an attenuated UK-1 derivative was shown to elicit higher levels of serum IgG to a heterologous antigen than a similarly attenuated derivative of strain SR-11 [13]. UK-1 has been extensively used in our laboratory for virulence and colonization studies in chickens and mice for over twenty years. UK-1 strain  $\chi$ 3761 was the parent strain from which the licensed vaccines for broilers and pullets, Megan<sup>®</sup>Vac and

Megan<sup>®</sup>Egg, respectively, were derived [9,14,15,16,17] and attenuated derivatives have been evaluated as vaccines for calves [18], horses [19], and dogs [20]. In recent years this strain has been used as the foundation for developing recombinant vaccines [21,22].

The pathogenesis of *S. enterica* has been extensively studied [23,24,25,26]. The rapid increase of genomic sequence data has revolutionized the study of bacterial pathogens and led to many improvements in vaccine design. The availability of more genome sequences has led to the discovery of additional genes and has fueled the new field of comparative genomics [27]. Comparative genome analysis is providing details on gene function and gene/genome evolution, leading to a better understanding of bacterial evolution and pathogenesis [28,29]. Even though genome sequences of several *S. Typhimurium* strains such as LT2, 14028s, D23580, and SL1344 have been available in public databases [6,30,31], additional *S. Typhimurium* sequences would be a valuable resource for improving our understanding of the biology of this species [32,33]. More importantly, comparison of multiple genomes in a particular species is a valuable aid for determining key differences between strains. These differences represent a genetic potential for each species that may not have been explored previously, and may be important for predicting emergence of drug resistance and new virulent forms of pathogens [34]. With genome-wide screening across multiple sequenced genomes, one could predict the genes that are linked to drug resistance or virulence, and identify vaccine candidates or antimicrobial targets [35,36]. In addition, not all virulence factors in pathogens increase the virulence of all strains; i.e. virulence factors in one strain may be dispensable for virulence or may actually decrease virulence when present in another strain. For example, the adhesion protein YadA is a virulence factor for *Yersinia enterocolitica*, but expression of *Y. pseudotuberculosis yadA* in *Y. pestis* reduces its virulence [37,38]. In the post-genomic era, whole genome analysis of multiple strains within one species has become an important and necessary approach for understanding bacterial species, in particular, pathogens with diverse virulence factors.

*S. Typhimurium* UK-1 is the main platform for vaccine study in our lab. An approach based on whole-genome comparison was applied to determine the complete genetic complements of known *S. Typhimurium* strains, which may determine the diversity of species and contribute to virulence of strains.

## Results and Discussion

### Virulence of the *S. Typhimurium* Strains

*S. Typhimurium* strain D23580 is a human host-adapted strain dominant in Africa [31], while UK-1, 14028s, and SL1344 are non-host-adapted strains [9,39,40,41]. We examined the virulence of the three non-host-adapted strains by measuring the median lethal dose (LD<sub>50</sub>). *S. Typhimurium* strain UK-1, which has an oral LD<sub>50</sub> of  $2.5 \times 10^4$  CFU with a lower limit of  $6.6 \times 10^3$  CFU and an upper limit of  $9.1 \times 10^4$  CFU (95% confidence level), was the most virulent (Table 1). Strains SL1344 and 14028s had LD<sub>50</sub>s that were 3-fold and 4-fold higher, respectively, than UK-1, although these differences were not statistically significant, since the confidence interval (CI) values for all three strains overlapped.

### General Genomics Features of UK-1 and Other *S. Typhimurium* Strains

The complete genome sequence of the UK-1 strain has been determined and annotated by our laboratory [33]. The general genomic features of UK-1 are represented in Fig. 1. The

**Table 1.** Virulence of wild-type *S. Typhimurium* strains for orally inoculated BALB/c mice.

| Strain | LD <sub>50</sub> (CFU) | Lower bound 95%   | Upper bound 95%   |
|--------|------------------------|-------------------|-------------------|
| UK-1   | $2.5 \times 10^4$      | $6.6 \times 10^3$ | $9.1 \times 10^4$ |
| 14028S | $9.6 \times 10^4$      | $4.2 \times 10^4$ | $2.2 \times 10^5$ |
| SL1344 | $7.8 \times 10^4$      | $3.5 \times 10^4$ | $1.8 \times 10^5$ |

doi:10.1371/journal.pone.0040645.t001

replication origin and terminus of UK-1, predicted by comparison with LT2 and confirmed by GC-skew [42], are near 4,004,924 bp and 1,503,568 bp, respectively. Comparison of the five genomes shows a high degree of similarity and gene synteny of genome core regions, including many of the *Salmonella* genetic islands (Fig. 2A and Fig. S1). Indeed, this comparative analysis highlights an extremely close relationship between UK-1 and LT2, 14028s, D23580, and SL1344. Of course it is the differences that we are most interested in and our comparison of the five strains discovered many features, including insertions, deletions, mutations and pseudogenes, which are related to genes with significant functions.

### Phages in the *S. Typhimurium* Strains

The *S. Typhimurium* strains analyzed so far carry between two and six prophages [7]. One of the differentiating features was a distinct repertoire of prophage-like elements in UK-1 (Fig. 2A). Of the four prophages found in UK-1, none were unique to UK-1. This is in contrast to the other strains, each of which contained prophages specific only to that strain and not occurring in the others (i.e., Fels-1 and Fels-2 specific to LT2, Gifsy-3 specific to 14028s, two prophages designated BTP1 and BTP5 specific to D23580, and a Fels-2-like prophage specific to SL1344; Fig. 2A). Interestingly, while UK-1 has four prophages, its genome carries the fewest number of bp corresponding to phage-specific sequences among the five *S. Typhimurium* strains (Fig. 2B).

Among the detected prophages, Gifsy-1, Gifsy-2, and a phage-like element were found in all five strains. A region of 11.6 kb inside Gifsy-1 is not conserved between the five *S. Typhimurium* genomes (Fig. 2C). It is one of the main polymorphic regions observed among the sequences of the five strains. In this region, a 3.5 kb segment was inserted into the UK-1 Gifsy-1 and shows distant homology to a segment of Gifsy-3 in 14028s. Another 6.4 kb segment was observed in 14028s and D23580, but has been replaced in UK-1, LT2, and SL1344 with other sequences unique to each of these strains. From the multiple genome alignments, it seems this region shows the typical gain and loss of sequences during genome evolution. The evolutionary relationship of this region is consistent with the phylogenetic tree, which proved to be a useful framework to investigate the recent evolution of phenotypic traits *S. Typhimurium*. Based on the phylogenetic tree, the ST64B-like phage, Gifsy-3, BTP1, and BTP5 are events of phage gain that occurred after divergence from the attenuated strain LT2. Fels-1 is missing in the virulent strains and SL1344 carries only remnants of Fels-2. Thus, it appears that Fels-1 and Fels-2 represent phage loss in the virulent strains. Alternatively, due to the important role of phages in horizontal gene transfer [7], it is possible that Fels-1 and Fels-2 were acquired by LT2 after divergence from the other lineages. It is estimated that these phage related events occurred less than 3,000 years ago [6].

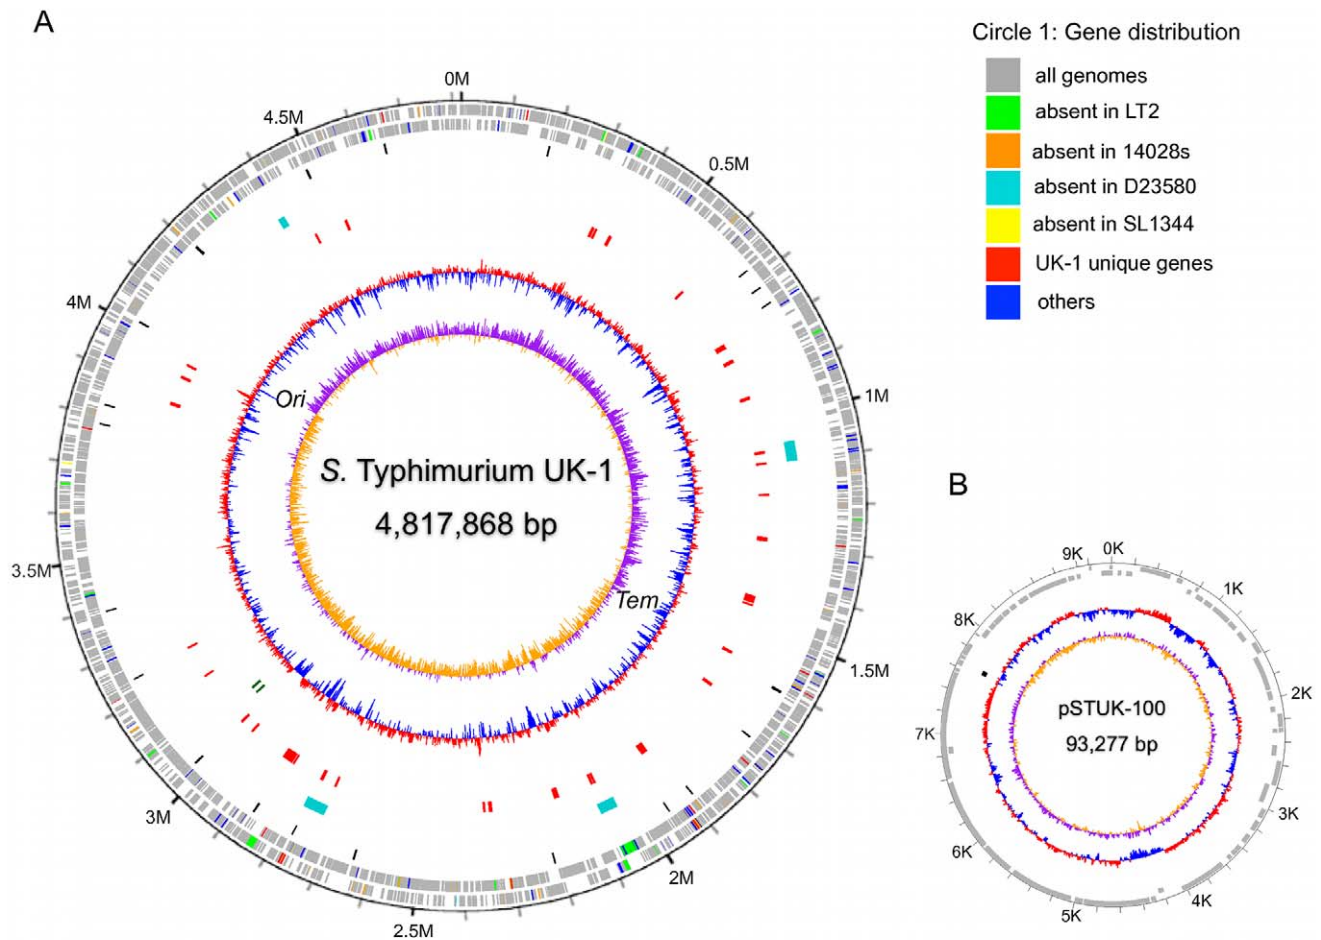

**Figure 1. Genome atlas of *Salmonella enterica* serovar Typhimurium UK-1.** (A) The chromosome. Base pairs are indicated outside the outer circle. The circles represent the following (from outside to inside): Circle 1 shows the distribution of predicted ORFs in the leading and lagging strands (see details in the color legend for Circle 1). Circle 2 shows the UK-1 pseudogenes (black, single circle). Circle 3 shows the phage regions in UK-1 (Cyan, single circle). Circle 4 shows the genomic islands predicted by IslandViewer [98] (red, single circle). Circle 5 displays the GC content of the genome (red: high GC content, purple: low GC content). Circle 6 displays GC skew ( $[(G+C)/(G-C)]$ ) plot. (B) The UK-1 plasmid pSTUK-100 genome. Base pairs are indicated outside the outer circle. From outside to inside: genes predicted in the plasmid genome (two circles; all ORFs are shown in grey since there were no unique genes found in the pSTUK-100 genome.), pseudogene(s) identified in pSTUK-100 (black, single circle), GC content of the plasmid genome (red: high GC content, purple: low GC content), and GC Skew Plot. For the GC content and GC skew analysis, we applied a sliding window of 1,000 bp with an overlap of 500 bp. The atlas was created using GenomeViz software [99]. doi:10.1371/journal.pone.0040645.g001

### Specific Genes in UK-1

As observed previously in other *S. Typhimurium* genomes [6,31], the genome content of UK-1 is highly similar to LT2, 14028s and other available *S. Typhimurium* genomes. A broader search through the whole genomes of LT2, 14028s, D23580 and SL1344, including both coding and noncoding regions, found only two genes that were unique to the UK-1 strain. Based on blast searches of the possible homologous genes in public databases, the two genes are related to the type III effector system and they are homologous to genes from the prophage Gifsy-3. The two UK-1 unique genes are located in prophage Gifsy-1, designated as STMUK\_2657 and STMUK\_2664 (red marked genes in Fig. 2C). STMUK\_2657 is homologous to the gene encoding a non-LEE encoded type III effector NleC-like protein (BLASTP identity = 73% and e-value <1e-173). STMUK\_2664 is homologous to the gene coding for a regulatory phage protein CII (BLASTP identity = 57% and e-value <4e-154). To determine whether these sequences play a role in virulence, we constructed deletion

mutations and tested the virulence of the resulting  $\Delta$ STMUK\_2657 and  $\Delta$ STMUK\_2664 deletion strains compared to the UK-1 parent when orally administered to BALB/c mice (see detailed results in Table S1). The LD<sub>50</sub> value of the  $\Delta$ STMUK\_2664 strain was similar to that of the UK-1 parent, indicating there was no effect of the deletion on virulence (Table 2). In contrast, LD<sub>50</sub> value of the  $\Delta$ STMUK\_2657 deletion strain was 10-fold higher than the LD<sub>50</sub> value of the UK-1 parent. This difference was significant because the confidence intervals did not overlap, thus indicating that the STMUK\_2657 sequences enhance the virulence of UK-1 and therefore constitute a newly discovered virulence factor.

### Pseudogenes

Pseudogenes are commonly observed in *Salmonella* genomes. They are usually created by deletions or insertions that cause a frame shift or by a nonsense SNP resulting in a stop codon within coding regions. Previous studies have identified pseudogenes in

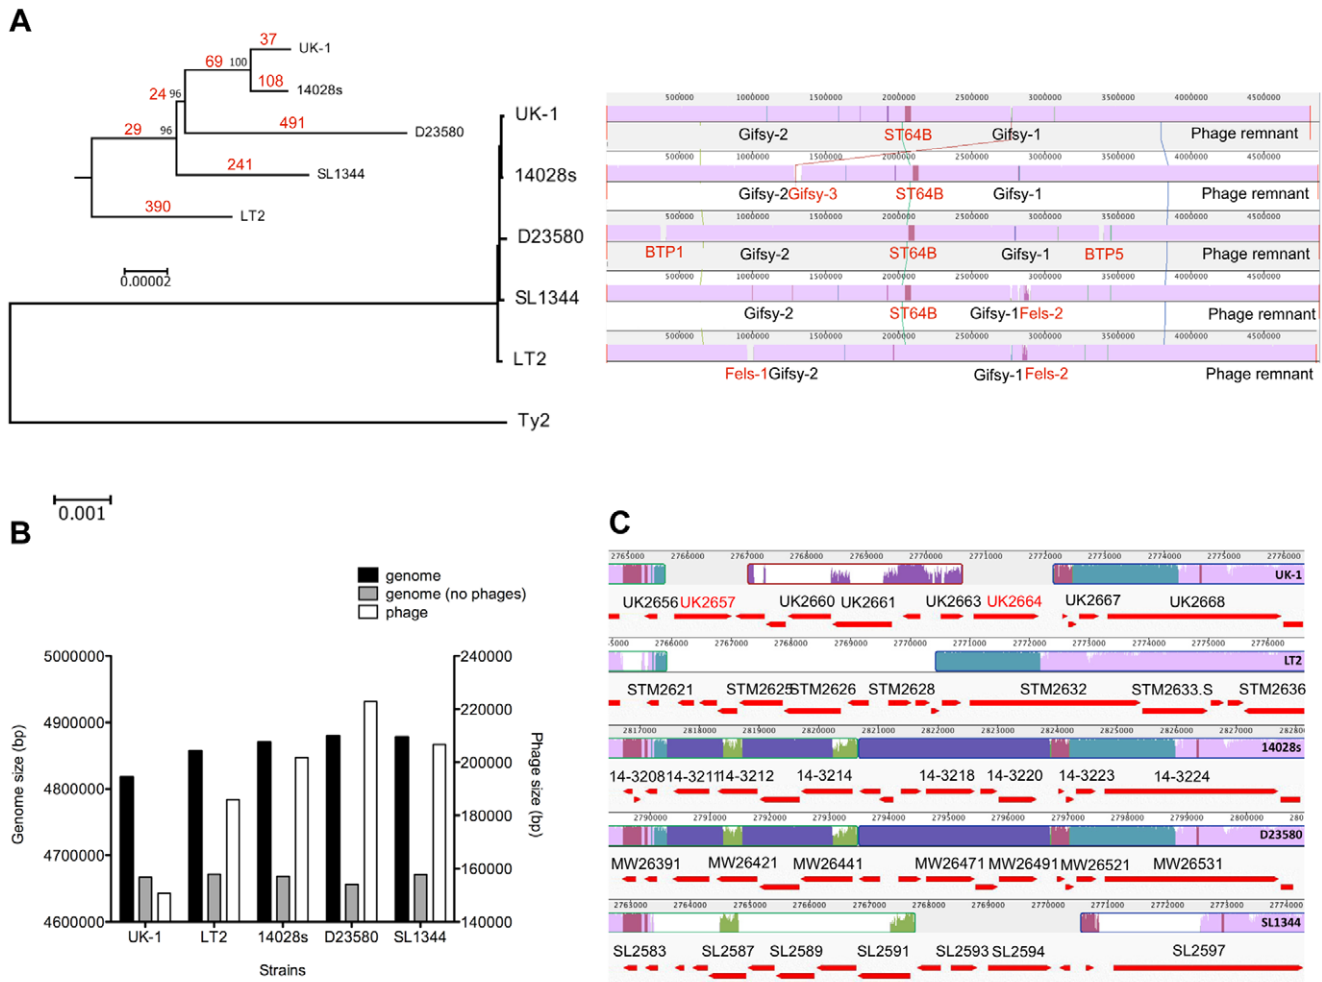

**Figure 2. Phylogenetic relationship of the five *S. Typhimurium* strains.** (A) The phylogenetic tree was inferred with ML method based on the conserved genomic sequences. The *S. Typhimurium* strains are rooted to *S. Typhi* Ty2. The upper-left subtree shows the phylogenetic relationship of the five strains in a smaller scale. The relationship was supported by the bootstrapping values shown on the subtree. The distance (marked in red) based on the number of SNPs was also presented on the phylogenetic tree. The right panel shows the complete genome alignment of the five strains generated in MAUVE [93]. The regions conserved among all genomes are colored in purple and the regions conserved among subsets of the genomes are colored differently. If the areas contain sequence elements not aligned, those are marked in white. Regions that are not colored indicate no detectable homology among the five genomes in MAUVE. The distinguished phages and phage remnants are marked on the alignment (black: detected among all of the five strains, red: detected in a subset of strains). (B) Comparison of the lengths of genomes, phages, and genomes excluding phage regions among the five *S. Typhimurium* strains. Length of phages is displayed on the second Y-axis due to the relatively small value of phages in contrast to the whole genome size. (C) Alignment of the UK-1 Gifsy-1 sequence segment harboring the two UK-1 unique genes with sequences from the other four *S. Typhimurium* strains. The sequence alignments were generated in MAUVE. The color scheme used for the alignment is described in Fig. 2A. The predicted genes in these regions are shown with red solid arrays. Each gene name is indicated with the strain name (UK indicates UK-1, STM indicates LT2, 14- indicates 14028s, MW indicates D23580, and SL indicates SL1344) followed by its locus number obtained from each of the annotation files. The two UK-1 unique genes are marked in red in the UK-1 genome. doi:10.1371/journal.pone.0040645.g002

LT2, 14028s and D23580 [6,30,31], but typically only a few *S. Typhimurium* strains were included in the analyses. For example, the pseudogenes in 14028s were determined by comparison to LT2 only. A more extensive comparison of the pseudogenes conducted using UK-1, LT2, 14028s, D23580 and SL1344 showed that many of the 14028s specific pseudogenes were also observed in UK-1 (Table S2), D23580 and SL1344. These genes include *ratB*, *lyfD*, *yacH*, STMUK\_1876, STMUK\_2665, and STMUK\_1639. Two other genes, *ybeU* and STM1228, were degraded or deleted in UK-1, 14028s, and SL1344, but were present in D23580 and LT2. In addition, the *nupG*, *alkA*, STMUK\_3244, STMUK\_3243, and STMUK\_0617 genes were degraded in UK-1 and 14028s but were present in

LT2, D23580, and SL1344. In total, there were 22 pseudogenes detected in the UK-1 chromosome (see the full list of the pseudogenes in Table S2). The LT2 gene STM2911 was degraded in UK-1 due to a single 'T' deletion within the coding region 65 bp upstream of the 3'-end of the gene STMUK\_2900. BLAST results indicated that STMUK\_2900 probably encodes a membrane translocase similar to the *Escherichia coli emrB* gene that confers multidrug resistance. There are more pseudogenes in D23580 than in UK-1 and 14028s, most likely due to the genome degradation associated with its evolution into a host-adapted strain [31]. In addition, two SL1344 genes, designated STM1833 and STM1896 and corresponding to UK-1 pseudogenes STMUK\_1806 and STMUK\_1876, were identified as being

important for survival and replication in macrophage-like cells or in the spleens of BALB/cJ mice by a microarray-based transposon tracking strategy [43].

### Polymorphism Sites

Multiple alignments comparing the UK-1 genome with the genomes of strains LT2, 14028s, D23580, and SL1344 were processed further to identify three types of genetic differences: (i) single nucleotide polymorphisms (SNP), (ii) inserted or deleted sequences (Indel) and (iii) variation number of tandem repeats (VNTR).

(i) SNP. SNPs were determined by pairwise comparison of genomic sequences from the five *S. Typhimurium* strains. Because of the transient nature of prophage presence and the fast decay of defective prophages in bacterial genomes, only SNPs detected outside of prophage sequences and repetitive regions were used in the analysis. The number of synonymous and nonsynonymous SNPs between each pair of strains are listed in the upper and lower triangular areas of Figure 3A. With reference to the other four genomes, 894 UK-1 genes carrying SNPs were detected and categorized based on the functional categories from the COG ontology database (Fig. 3B) [44]. 633 genes have well defined functions (379 for metabolism, 132 for cellular processes and signaling, and 122 for information storage and processing) and 261 are poorly characterized or have unknown function. For each COG category, the distribution of the UK-1 genes carrying SNPs was determined according to the number of reference genomes that provide the basis for the UK-1 SNPs. These are shown in Figure 3B as groups “one-strain”, “two-strains”, “three-strains” and “four-strains”. So for instance, group “one-strain” contains 702 genes identified as SNPs based on comparison to genes from only one of the other four genomes. Group “two-strains” contains 68 genes carrying SNPs with respect to genes from only two of the four genomes, and so forth. Most significantly, group “four-strains” contains 62 genes carrying SNPs with respect to genes from all four reference genomes. Thus, these 62 genes carry the UK-1-specific SNPs that are likely to be the most relevant for distinguishing UK-1 from the other four strains. Genes from the group “four-strains” occur in many functional COGs, suggesting that the SNPs could result in a variety of potential phenotypes. In order to understand the functional significance of the UK-1 SNPs, we referred to the known phenotypes of mutations in the polymeric genes produced by microarray-based experiments [43,45,46,47]. Of the 894 genes carrying SNPs, 70 genes carrying nonsynonymous SNPs and 38 carrying synonymous SNPs were detected to be possible virulence-related factors in mice. The SNPs detected in the UK-1 strain with respect to the four other *S. Typhimurium* strains are listed in Table S3.

(ii) Indel. Indels can occur both in coding and non-coding sequences. Genomic regions with repetitive sequences make genome alignment more difficult since one repetitive region can be matched to several other regions. In addition, phage regions are highly divergent. For these reasons, we analyzed only indels detected outside of phages and repetitive regions. We detected sixteen deletions and 31 insertions in the UK-1 genome (see deletions in Table 3 and insertions Table S4). Indels DEL-06 and INS-04 were UK-1 specific, while the remaining indels were observed in one or more of the other genomes. DEL-06 is a deletion of twelve base pairs inside the UK-1 gene *nlpD* and INS-04 is an insertion of 18 bp in the UK-1 gene *STMUK\_2562* (corresponding to *STM2530* in LT2), encoding a putative anaerobic dimethyl sulfoxide reductase. Four indels (DEL-04, INS-10, INS-13, and INS-20) occur in the genes *STMUK\_1666*, *pckA* (*STMUK\_3486*), *ybiP* (*STMUK\_0838*), and *STMUK\_3000*, respectively (Table 3 and S4). These four genes are important during infection of BALB/c mice based on microarray analyses [43,45,47].

Indels may contribute to virulence and genome diversity when they are linked to genes with significant functions. For instance, *avrA*, encoding the virulence-associated effector protein AvrA, has been 3'-end truncated in both UK-1 and 14028s, compared with the other strains. AvrA is one of the 19 proteins within *Salmonella* pathogenicity island 1 (SPI-1) that are secreted by the type-3 secretion system (T3SS) within SPI-1 [48,49,50]. AvrA plays an anti-inflammatory role enhancing bacterial survival in the host [51]. We plan to explore the impact of the AvrA variation on virulence. In addition, DEL-12 is located within the promoter region (96 bp upstream) of *oafA*, which encodes O-antigen acetylase. It will be interesting to investigate the effect of these variations on *Salmonella* virulence.

Another interesting variation is a 12 bp deletion in *nlpD* [52]. *nlpD*, which encodes the lipoprotein NlpD, is located 62 bp upstream of the *rpoS* gene and 175 bp downstream of the *pcm* gene in UK-1. *nlpD* and *rpoS* constitute an operon [52] and *rpoS* is a virulence factor for *Salmonella* [53]. The major, growth phase-regulated *rpoS* promoter is located within the coding region of *nlpD* and a second promoter that does not appear to be regulated by growth phase lies upstream of *nlpD* [52,54]. The location of the UK-1 deletion in *nlpD* falls outside of the *rpoS* promoter region [55], indicating that it is unlikely to influence *rpoS* expression. In *Yersinia pestis*, deletion of the *nlpD* gene sequence resulted in a drastic reduction in virulence for subcutaneous and airway routes of infection [56]. Comparison of the NlpD protein sequences from UK-1 and *Y. pestis* shows 60% identity between the two proteins. They contain conserved domains, indicating the possibility that the *S. Typhimurium* NlpD protein serves a similar function to the one in *Y. pestis*. Further functional studies are required to understand the full significance of these genes in *Salmonella*.

(iii) VNTR. A VNTR is defined as a tandem repeat that represents a single locus and shows length polymorphisms between individuals [57]. As another important type of genetic variation, VNTRs play a role in evolution, gene regulation, genome structure, and virulence [58,59]. Furthermore, because it allows the bacterium to act swiftly based on deleterious environmental conditions [60], VNTRs have clear implications for virulence and antigenic variation [59]. All possible tandem repeats including short patterns (2–5 bp) and long patterns (>100 bp) were explored in the complete genome sequences of *S. Typhimurium* UK-1, LT2, 14028s, D23580, and SL1344. Altogether, 43 VNTRs with distinct patterns were detected among the five strains, 22 of which occurred in all five *S. Typhimurium* strains (Table S5). Of the 31 VNTRs observed in

**Table 2.** Virulence comparison between the  $\Delta$ STMUK\_2657 and  $\Delta$ STMUK\_2664 mutants and the UK-1 parent strain for orally inoculated BALB/c mice.

| Strain                   | LD <sub>50</sub> (CFU) | Lower bound 95%       | Upper bound 95%       |
|--------------------------|------------------------|-----------------------|-----------------------|
| UK-1 wt                  | 1.5 × 10 <sup>4</sup>  | 6.0 × 10 <sup>3</sup> | 3.8 × 10 <sup>4</sup> |
| UK-1 $\Delta$ STMUK_2657 | 5.7 × 10 <sup>5</sup>  | 1.6 × 10 <sup>5</sup> | 2.1 × 10 <sup>6</sup> |
| UK-1 $\Delta$ STMUK_2664 | 2.0 × 10 <sup>4</sup>  | 8.0 × 10 <sup>3</sup> | 4.7 × 10 <sup>4</sup> |

doi:10.1371/journal.pone.0040645.t002

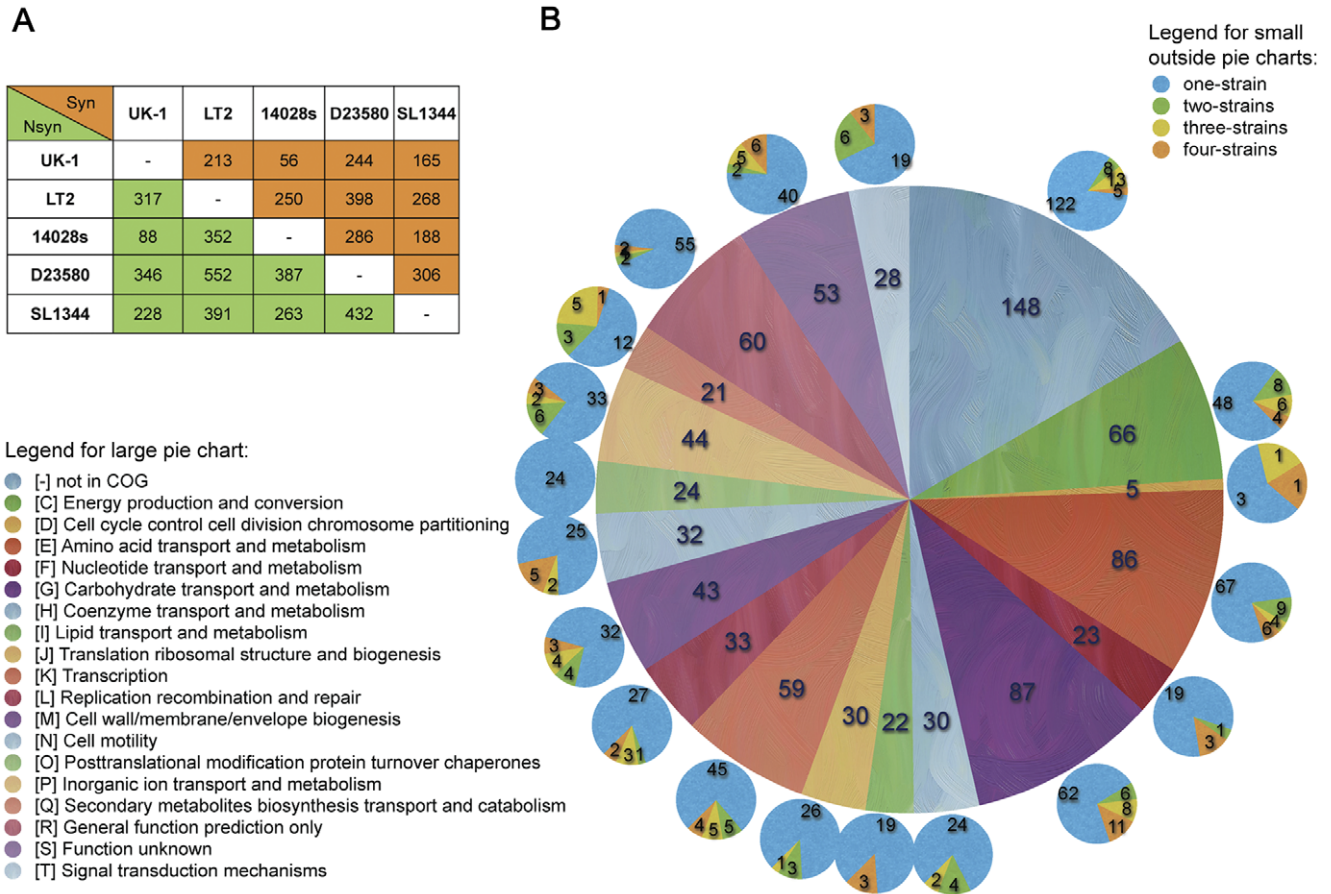

**Figure 3. SNPs detected in the UK-1 strain with respected to the four *S. Typhimurium* genomes.** (A) Pair-wise comparison of the synonymous and nonsynonymous SNPs among the five sequenced *S. Typhimurium* strains. (B) The distribution of UK-1 genes containing SNPs. The inner pie chart shows the number of genes carrying SNPs grouped by COG category [44]. For each group, the distribution of genes is shown in the outer pie charts, which describe the number of reference strains that contribute to the UK-1 SNPs. The legend of the inner pie chart is shown at the left of the pie charts. The legend of the outer pie charts is shown in the upper-right corner. doi:10.1371/journal.pone.0040645.g003

UK-1, 13 represent variations from other genomes (Table 4). These 13 VNTRs range from 6 to 184 bp, and 7 have repeat lengths of multiples of three. Three VNTRs are UK-1 specific, with lengths of 22, 105, and 53 bp and corresponding copy number 7.2, 2.5, and 2.9 respectively. VNTR-03, -13, -19, and -23 with unit length of 39, 6, 6, and 33 bp, respectively, carry different copy numbers among the five strain genomes (Table 4). The observations show that VNTRs are a major contribution to the diversity of *S. Typhimurium* genomes.

These repeats, when present in genes with significant functions, should prove interesting for further study. VNTRs are believed to play a role in pathogen evasion of the host immune system [58,59]. We identified many VNTRs in UK-1 that are related to genes within phage sequences or in genes with significant functions. For instance, VNTR-13 is located within phage Gifsy-1 between the virulence-associated gene *gogB*, encoding a leucine-rich repeat protein, and the gene STMUK\_2617, encoding a transposase. VNTR-19 is located within *yohM*, a gene that codes for the nickel and cobalt efflux protein RcnA involved in nickel and cobalt resistance [61]. The variable copy numbers of VNTR-19 among the *S. Typhimurium* strains may be result differences in selective pressure imposed by these metals over the evolution of these strains [61]. VNTR-23, the most common VNTR locus among *S. Typhimurium* isolates, is located within *bigA*, a large gene

encoding a surface-exposed adhesin protein, with 12, 11, 12, 10, and 12 copies in UK-1, LT2, 14028s, D23580, and SL1344, respectively.

**CRISPR**

Clustered regularly interspaced short palindromic repeats (CRISPRs) are a distinctive feature of the prokaryotic genomes [62,63]. CRISPRs, together with CRISPR associated sequence (CAS) proteins, have recently been discovered as a novel prokaryotic immune-like system involved in resistance to bacteriophage infection [64,65,66,67]. This has been linked to the acquisition of CRISPR sequences from infecting phage. CRISPRs have hypervariable genetic loci due to their high diversity of spacers (interspaced regions between palindromic repeats). CRISPR\_1 and CRISPR\_2, previously analyzed in LT2 [68], were found in UK-1, 14028S, D23580 and SL1344 (Fig. 4A).

17 CRISPR-associated (*cas*) genes were located around CRISPR\_1 and CRISPR\_2 in all five *S. Typhimurium* strains. The palindromic repeats showed high similarities among the five strains, but the spacers were variable (Fig. 4B). For instance, in CRISPR\_1, UK-1 lacks the first six spacers observed in 14028S, D23580 and SL1344. Additionally, five spacers in CRISPR\_1 and three in CRISPR\_2 were observed only in LT2. Several studies reported that many spacers frequently match to phage and other

**Table 3.** Deletions detected in the UK-1 strain by referring to the other four *S. Typhimurium* strains.

| Id     | Location         | Reference strain                | Configuration                                                                        | Strand | Genes             | Frame shift |
|--------|------------------|---------------------------------|--------------------------------------------------------------------------------------|--------|-------------------|-------------|
| DEL-01 | 184614           | LT2                             | GATGATCT                                                                             | –      | <i>yacH</i>       | YES         |
| DEL-02 | 282141           | LT2                             | GTAT                                                                                 | +      | STMUK_0243        | YES         |
| DEL-03 | 314636           | LT2                             | CAACAGGCGCTGGCG                                                                      | +      | STMUK_0276        | NO          |
| DEL-04 | 1748037          | LT2                             | GC                                                                                   | –      | STMUK_1666        | YES         |
| DEL-05 | 2979255, 2979296 | LT2, D23580, and SL1344         | A, ACGATAAAAACTCTCTAT<br>ATCCGCTCATAAAAAAGG<br>ATAGCTGAATATAAGTCTT<br>TACTTAAACCGTAA | –      | <i>avrA</i>       | NO          |
| DEL-06 | 3035962          | LT2, 14028s, D23580, and SL1344 | CTTGTTGCGGCG                                                                         | –      | <i>nlpD</i>       | NO          |
| DEL-07 | 3213439          | LT2                             | ATGCTGCGATGCTGCG                                                                     |        | Non-coding region |             |
| DEL-08 | 3784996          | LT2                             | ATTCTCAAAC                                                                           |        | Non-coding region |             |
| DEL-09 | 1185346          | D23580                          | CGCTGGCGCTGG                                                                         | +      | <i>ycdZ</i>       | NO          |
| DEL-10 | 1190462          | D23580                          | GG                                                                                   | +      | STMUK_1115        |             |
| DEL-11 | 2038043          | D23580                          | GATGGCGGT                                                                            | +      | <i>ompS</i>       | NO          |
| DEL-12 | 2331779          | D23580                          | GTTGATGTA                                                                            | +      | <i>oafA</i>       | Promoter    |
| DEL-13 | 2875055          | D23580                          | TTGCCGCGAT                                                                           | –      | STMUK_2752        | YES         |
| DEL-14 | 3728707          | D23580                          | GGCATCGCCAGCGCC                                                                      | –      | STMUK_3580        | NO          |
| DEL-15 | 3769415          | D23580                          | AA                                                                                   |        | Non-coding region |             |
| DEL-16 | 69408            | SL1344                          | TTA                                                                                  | +      | <i>citC2</i>      | NO          |

doi:10.1371/journal.pone.0040645.t003

extrachromosomal elements [69,70,71]. However, we found that all spacers in CRISPR\_1 and CRISPR\_2 from all five strains were unique sequences with no homology to known phages or extrachromosomal elements. Interestingly, one spacer, spacer 17 in LT2 CRISPR\_1 matched with 100% identity to many eukaryotic sequences. Thus, in *S. Typhimurium* we found no

sequence information to support a role for CRISPRs in phage immunity. Alternatively, some authors have suggested that non-identity-spacers might mediate the interaction between CRISPRs and bacteriophage [72,73]. For instance, spacer 1 of *Pseudomonas aeruginosa* strain UCBPP-PA14 is not identical to any region of the phage DMS3 genome, but mediates DMS3-dependent loss of

**Table 4.** VNTRs identified in the UK-1 genome that are not consistent in the five strains.

| Id      | Name           | Repeat Configuration               | UK-1 Locus | Strains |      |        |        |        |
|---------|----------------|------------------------------------|------------|---------|------|--------|--------|--------|
|         |                |                                    |            | UK-1    | LT2  | 14028s | D23580 | SL1344 |
| VNTR-02 |                | [155 bp]                           | 819953     | 2.6     |      | 2.6    | 2.6    | 2.6    |
| VNTR-03 | STTR7          | [39 bp]                            | 997189     | 7.5     | 8.1  | 7.5    | 7.5    | 7.5    |
| VNTR-04 |                | CAGCAGCCGGTAGCG<br>CCGCAGCCACAGTAT | 997444     | 2.3     |      | 2.3    |        |        |
| VNTR-05 |                | GAAAACAGGGATAG<br>TTATCCCC         | 1064337    | 3.6     | 3.6  | 3.6    |        | 3.6    |
| VNTR-06 |                | [184 bp]                           | 1181777    | 2.4     |      | 2.4    | 2.4    | 2.4    |
| VNTR-13 | STTR6          | GCAAGG                             | 2730631    | 8.7     | 13.7 | 9.7    | 9.7    | 8.7    |
| VNTR-14 |                | [105 bp]                           | 2768796    | 2.5     |      |        |        |        |
| VNTR-15 |                | CTATCCCCGTTTTTC<br>[AG]GGGATAA     | 2768876    | 7.2     |      |        |        |        |
| VNTR-18 |                | [121 bp]                           | 3045681    | 2.2     |      | 2.2    | 2.2    | 2.2    |
| VNTR-19 | STTR5 or Sal16 | CACGAC                             | 3151921    | 26.3    | 13.3 | 20.3   | 7.3    | 8.3    |
| VNTR-22 |                | ATGGCGGCAACGTC<br>ACCCCGCCGACG     | 3590943    | 3.3     |      | 3.3    | 3.3    | 3.3    |
| VNTR-23 | STTR3          | [33 bp]                            | 3591011    | 11.9    | 10.9 | 11.9   | 9.9    | 11.9   |
| VNTR-28 |                | [53 bp]                            | 3917755    | 2.9     |      |        |        |        |

doi:10.1371/journal.pone.0040645.t004

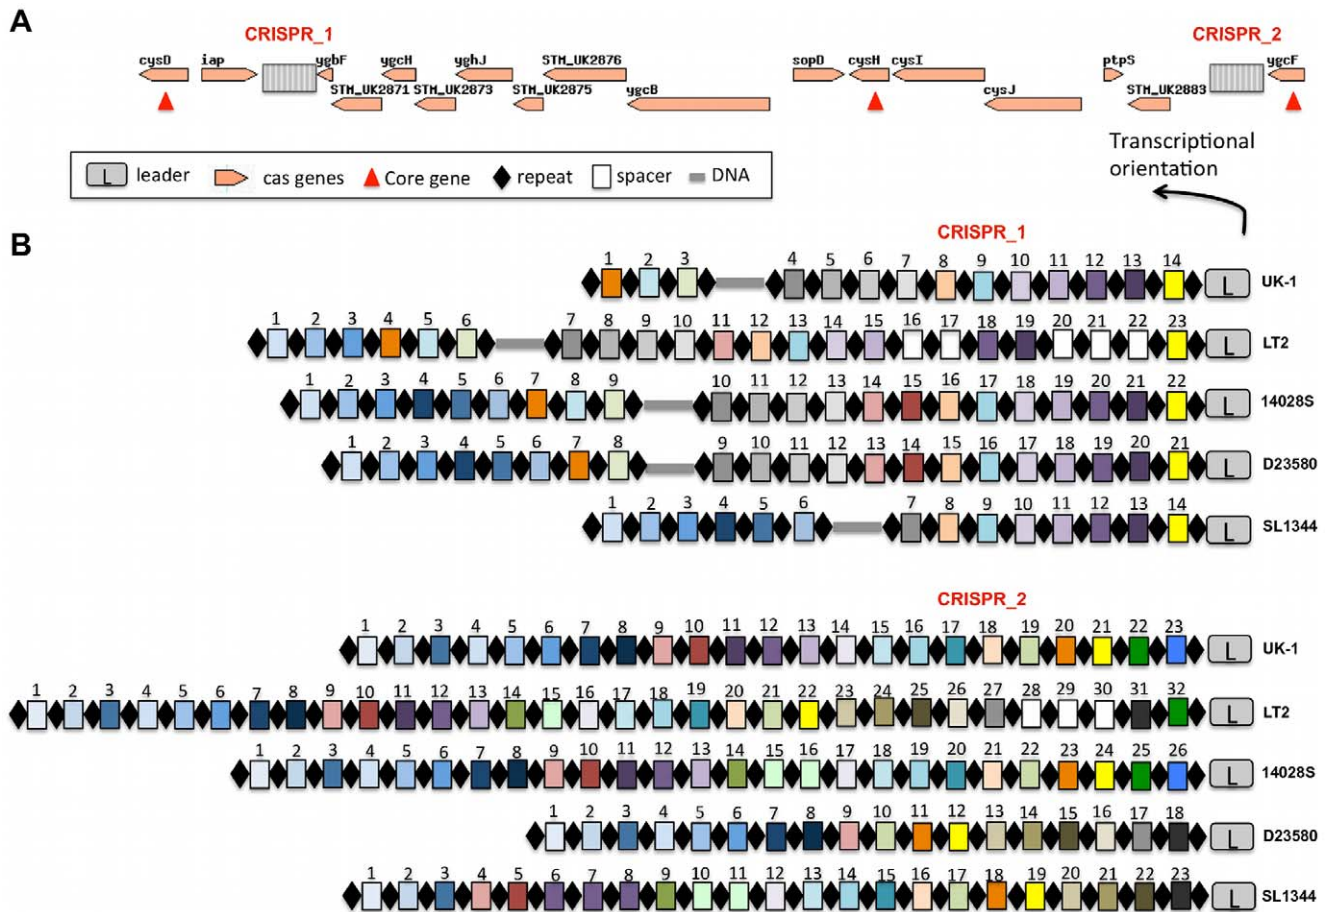

**Figure 4. Two CRISPRs detected in the five *S. Typhimurium* strains.** (A) Genetic map of the two CRISPR/*cas* systems present in *Salmonella* Typhimurium UK-1. 17 *cas* genes were detected around the two CRISPRs. Three core *cas* genes are noted with red triangles. (B) Overview of the two CRISPR loci in the five *S. Typhimurium* strains. The repeats are shown as dark diamonds. Spacers are shown as colored rectangles. In each CRISPR, spacers with identical sequence in the studied genomes are shown in the same color. The white rectangles indicate the strain specific spacers. doi:10.1371/journal.pone.0040645.g004

biofilm formation [72]. Removal or addition of particular spacers modified the phage-resistance phenotype of the cell [64]. The spacer diversity among the five *S. Typhimurium* strains indicates that the CRISPRs may play some interesting roles other than in phage immunity.

#### Polymorphisms in the *Salmonella* Virulence Plasmid

The large virulence-associated plasmid present in UK-1, pSTUK-100, is closely related to the LT2 plasmid pSLT and similar plasmids from 14028s, D23580 and SL1344. The five plasmids are likely to have the same ancestor. Comparing the sequence of pSTUK-100 with the other four plasmids, several deletions were detected to be pSTUK-100 specific. For example, a 578 bp region in a putative adhesion protein gene defined in pSLT, was absent in pSTUK-100, but was present in other studied virulence plasmids (Fig. S2). This novel deletion in UK-1 might have an effect on virulence since there is evidence that deletion of genes can lead to enhanced virulence of pathogens [37,74]. A 6 bp segment in *spvB* (GCCACC) was absent in pSTUK-100. *spvB* is a structural gene in the *spv* (*Salmonella* plasmid virulence) operon that is important for *Salmonella* virulence in mice [39,75]. In addition, deletions in pSTUK-100 were also detected in other *S. Typhimurium* plasmids, including the 81 nucleotide deletion in *traD* observed in the plasmids of UK-1, 14028s,

D23580 and SL1344, but not in pSLT. More work and experiments are needed to further verify the functional significance of these deletions.

SNPs in the pSTUK-100 coding regions were also examined. Two nonsynonymous SNPs are pSTUK-100 specific and located within *trbB* (CCC changed to TCC) and *spvD* (TGC changed to GGC). Most of the SNPs detected in pSTUK-100 were also observed in a subset of the other studied plasmids. For example, we found SNPs within the *tra* regions compared to virulence plasmids from D23580 and SL1344, but not when using virulence plasmids from LT2 or 14028s as the reference. Nonsynonymous SNPs in *traE* (CCG changed to TCG) and *orf6* (CAG changed to CAT) were detected only for pSLT. Other plasmid pSTUK-100 genes, such as fimbrial gene *pefD*, DNA replication gene *repA2*, and *sdhA*-regulated gene *sgbB*, were also found to carry SNPs.

In addition, one VNTR locus was detected with copy number of 12.2, 10.2, 7.2, 9.2, and 7.2 in the virulence plasmids from UK-1, LT2, 14028s, D23580, and SL1344, respectively. This VNTR is located 29 bp downstream of a gene encoding a putative inner membrane protein STMUK\_p038 and 630 bp upstream of the gene encoding the single-strand binding protein SsbB.

Identification of all possible variations in the virulence-associated plasmid of *S. Typhimurium* should provide us with important clues to the virulence and diversity of the UK-1 strain.



It is of interest to note that when the virulence plasmids of strains LT2, SL1344 and 14028s were interchanged, there was no effect on the competitive index in co-immunized BALB/c mice, indicating that, at least for these three strains in this model, the virulence plasmids were equivalent [76]. It will be interesting to perform a similar analysis with the UK-1 virulence plasmid to determine whether pSTUK-100 provides an advantage to other strains and, if so, to examine what role the observed polymorphisms in pSTUK-100 may play in virulence.

### Phylogenetic Analysis

The phylogenetic tree based on the conserved regions of whole genomes represents the evolutionary relationship of the five *S. Typhimurium* strains (Fig. 2A). The tree shows that all divergent events among UK-1, 14028s, D23580 and SL1344 occurred later than the time that virulent strains diverged from avirulent strains, indicating that LT2 shared a most recent common ancestor with the other Typhimurium strains. Interestingly, pairwise comparison of the SNPs among the five genomes show that D23580 harbors the most SNPs among the five strains, which indicates that D23580 is a highly divergent isolate with extensive genetic diversity. There is also evidence of genome degradation in UK-1 (23 pseudogenes detected) when compared with other *S. Typhimurium* genome sequences, except D23580. The amount of genome degradation is greater in the invasive, multidrug-resistant host-adapted strain D23580 (77 pseudogenes) that emerged in Africa in recent years [31]. The observed variation in D23580 is consistent with the notion that genome evolution (including genome degradation) occurs as *Salmonella* strains undergo progressive adaptation to particular hosts, thus providing a unique window into our understanding of the evolution of host adaptation [77].

The estimated divergence time between LT2 and 14028s suggests that the common ancestor of these *S. Typhimurium* strains existed around 9000 years ago [6]. The phylogeny would be a useful framework for investigating the recent evolution of phenotypic traits such as the acquisition of resistance to bacteriocin [78], a class of antibiotics used to treat salmonellosis and acute gastroenteritis caused by *Salmonella*.

### Summary

We have conducted a thorough comparative genome analysis of UK-1 with other *S. Typhimurium* strains by utilizing a vast array of bioinformatic software tools. Sequencing of the *S. Typhimurium* UK-1 genome and comparative analysis provide key information for evaluating the functional characterization of important genetic determinants of *S. Typhimurium*. It demonstrates that even highly similar *S. Typhimurium* strains could be differentiated once the polymorphic genomic regions are identified and analyzed. Studying these variations may lead to the discovery of new virulence determinants that can be used as targets in the development of novel intervention strategies for both the prevention and treatment of infectious diseases.

### Materials and Methods

#### Ethics Statement

Animal studies were carried out in strict accordance with the recommendations in the Guide for the Care and Use of Laboratory Animals of the National Institutes of Health. The protocol was approved by the Arizona State University Animal Care and Use Committee (Protocol Number: 11-1168R).

### Strain Description

*Salmonella* Typhimurium UK-1 ( $\chi$ 3761) is a chicken-passaged isolate of strain  $\chi$ 3663, a highly virulent *S. Typhimurium* strain isolated from an infected horse [9]. A day-of-hatch specific pathogen free white leghorn chick was orally inoculated with strain  $\chi$ 3663. *Salmonella* was isolated from the spleen of the chick three days later. One of the spleen isolates was designated strain  $\chi$ 3761.

### Suicide Plasmids and Mutant Strain Construction

For the  $\Delta$ STMUK\_2657 deletion, two pairs of primers **YQ-1F**(aaatttcattctctacgccttg)/**YQ-1R**(catcccaattctgtg-cacttccttattatg) and **YQ-2F**(agtgcacacagaattgggatggg-caatocct)/**YQ-2R**(tgattatgtttgtctacgaag) were used to amplify approximately 300-bp upstream and downstream fragments of gene STMUK\_2657, respectively, from the  $\chi$ 3761 genome. The two fragments were then fused by PCR using primers **YQ-1F** and **YQ-2R**. The terminal A was added at both ends to the resulting PCR product by GoTaq enzyme (Promega), which was inserted into T-cloning suicide vector pYA4278 [79] to generate plasmid pYA5197 carrying a 324 base-pair deletion of the STMUK\_2657 gene (from 2766418 base to 2766084 base). A similar strategy was used to construct plasmid pYA5198 ( $\Delta$ STMUK\_2664) (**YQ-3F**:accgcgttctctggagatg/**YQ-3R**:caaaagatttcgaaagattt-catttaacg and **YQ-4F**:aaatcttgcgaaatctttgagaaatggattg/**YQ-4R**:aagaataagaaccgatcagc), which carries a 444 bp deletion in the STMUK\_2664 gene (from 2771580 base to 2771136 base). The mutations were independently introduced into *S. Typhimurium*  $\chi$ 3761 by allelic exchange by conjugation with *E. coli* strain  $\chi$ 7213 harboring suicide plasmids pYA5197 and pYA5198 to generate  $\Delta$ STMUK\_2657 ( $\chi$ 11476) and  $\Delta$ STMUK\_2664 ( $\chi$ 11477), respectively.

### Bacteriophage Typing

Bacteriophage typing was performed by the National Veterinary Services Laboratories in accordance with the method of the Health Protection Agency, London, United Kingdom [80].

### LD<sub>50</sub> Examination of Virulence of *S. Typhimurium* Strains in Mice

The virulence of the *Salmonella* strains was determined by determining the LD<sub>50</sub> in mice according to our standard procedure [81]. We examined the virulence of four non-host-adapted strains UK-1, 14028S, and SL1344 by measuring the median lethal doses. Strain D23580 was not available at the time that we performed the experiments. Therefore, D23580 was not included in our analysis. Each strain was grown from a single colony in LB broth overnight at 37°C [82]. One ml of each broth culture was inoculated into 100 ml of pre-warmed fresh LB broth. The cultures were grown in LB with aeration, shaking at 180 rpm to 0.85 OD<sub>600</sub>. Cells were collected by centrifugation at 4100 rpm for 15 minutes at room temperature. Each pellet was resuspended in phosphate buffered saline-gelatin to a dose of approximately  $1 \times 10^9$  CFU per 20  $\mu$ l. The prepared samples were diluted serially to prepare inocula and exact titers determined by plating serial dilutions on LB agar plates. Female BALB/c mice, 6–7 weeks old, were obtained from Charles River Laboratories. Mice were acclimated for 7 days before starting the experiments. 7–8 week old female BALB/c mice were fasted for 4–5 h and inoculated orally with the prepared strain samples. A 20  $\mu$ l volume containing  $10^2$ ,  $10^3$ ,  $10^4$ ,  $10^5$ ,  $10^6$ , and  $10^7$  CFU of each strain were used to orally inoculate five mice per dose group. Mice were observed daily after inoculation. We repeated this experiment three times.

We used the same strategy to examine the virulence of the  $\Delta$ STMUK\_2657 and  $\Delta$ STMUK\_2664 mutants. To evaluate colonization, mice were orally inoculated with 20  $\mu$ l BSG containing  $1 \times 10^9$  CFU each strain. In the first experiment, 20  $\mu$ l containing  $10^3$ ,  $10^4$ ,  $10^5$  or  $10^6$  CFU of UK-1 wild-type strain were used to orally inoculate five mice per dose group and 20  $\mu$ l containing  $10^4$ ,  $10^5$  or  $10^6$  CFU of each of the two mutant strains was used to inoculate 2 mice per dose group. After the preliminary experiment, three repeats were performed. For each repeat, 20  $\mu$ l containing  $10^2$ ,  $10^3$ ,  $10^4$ ,  $10^5$  or  $10^6$  CFU of each strain was used to orally inoculate groups of five mice. We used all data combined in our analyses.

Treatment groups receiving similar doses were combined, using the weighted average of the exact CFU/group as the dose for the combined group. This resulted in more mice per dose group. The LD<sub>50</sub> and its upper and lower 95% confidence limits were determined using the trimmed Spearman-Kärber method [83]. Calculations were done by a DOS program available from the U.S. EPA (<http://www.epa.gov/eerd/stat2.htm#tsk>) that also trimmed the data when appropriate.

### Genomic Data Source

The complete *S. Typhimurium* UK-1 genome has been deposited into GenBank under accession numbers CP002614 for the bacterial chromosome and CP002615 for the plasmid. As of this writing there were four other *S. Typhimurium* genomes available in the public database. Annotation files of LT2 (Accession no: NC\_003197 and NC\_003277), 14028s (Accession no: CP001363 and CP001362), and D23580 (Accession no: FN424405 and FN432031) were obtained from NCBI GenBank (<ftp://ftp.ncbi.nih.gov/genomes/Bacteria>). SL1344 was obtained from the Sanger Institute (<ftp://ftp.sanger.ac.uk/pub/pathogens/Salmonella/>).

### Pseudogene Identification

Due to the high similarity between the five *S. Typhimurium* genomes, the output from SPALN was further analyzed to identify pseudogenes since SPALN mapped any homologous genes from the reference genome onto the UK-1 genome [84]. We first mapped all gene sequences from LT2, 14028s, D23580 and SL1344 onto the UK-1 genome, respectively. SPALN identified all the orthologous genes (or segments) found in the UK-1 genome. We determined anchors (pairs of genes, one from UK-1, and the other one from the reference genome) by BLASTP using identity greater than 80 to remove lower probability matches [85]. Then we aligned each pair of two anchoring genes using MUSCLE [86]. Possible gene-inactivating mutations, including insertions, deletions, pre-mature stop codons, or remnants of genes in the UK-1 genome were inferred based on the annotated gene in the reference genome. All predicted pseudogenes were manually inspected for consistency regarding gene synteny (both homology and order).

To ensure high accuracy of this method for the identification of pseudogenes, we also compared the pseudogenes in 14028s and D23580 identified by our method, with those detected in the studies of Jarvik et al. and Kingsley et al., respectively [6,31]. As expected, the two lists of pseudogenes are highly consistent, lending a degree of confidence to our method of identifying pseudogenes in UK-1. All the pseudogenes caused by substitutions or small indels (<6 bp), were verified by Sanger sequencing of PCRs.

### Identification of SNPs

The genomic sequence for SNP analysis did not include phage or repetitive regions in order to minimize the noise in highly active regions. SNPs between any two *S. Typhimurium* strains were

detected using the NUCmer and shown-snps programs in the MUMmer 3 package [87]. SNPs and small indels (length of insertion or deletion greater than one nucleotide) located inside both coding and non-coding regions were determined with PERL scripts. The SNPs within coding regions were then classified as synonymous or nonsynonymous by the method described by Nei and Gojobori [88] using a modified SNAP program [89].

### Identification of Variation Number of Tandem Repeats

A tandem repeat is another type of mutational event, which consists of two or more contiguous, approximate copies of a pattern of nucleotides. We determined the tandem repeats in each genomic sequence by employing Tandem Repeats Finder [57], with a strict threshold of minimum alignment score of 80, and other default parameters. Copy number refers to the number of repeat copies aligned with the consensus pattern.

### CRISPR Analysis

CRISPR loci were detected using CRISPRFinder [90]. Non-coding sequences located at the 5'-end of the first identified CRISPR repeat for each locus were selected as putative leader sequence. The Hidden Markov models (HMMs) for the 45 Cas protein families were obtained from TIGRFAM [91]. Identification of *cas* genes was performed using hmmscan in hmmer-3.0 [92] and BLASTP [85]. Similarities to spacers were searched for against the nt database obtained from NCBI (<ftp.ncbi.nih.gov/BLAST/db/>) using the BLASTN program by turning off the filter setting for short/near exact matches and a word size of 7 [85].

### Phylogeny

*Salmonella* Typhi Ty2 (Accession no: NC\_004631) was used to root the *S. Typhimurium* phylogeny. We used whole genomic sequences excluding phage and repetitive regions to infer the phylogenetic relationship of *S. Typhimurium* genomes. Whole genome alignments were performed with the progressive alignment method in MAUVE [93]. Ambiguously aligned regions were omitted using Gblocks ver. 0.91b [94]. The phylogeny was inferred with 4,270,594 nucleotides using two methods: MEGA5 for Neighbor-Joining (NJ) [95] and RAXML for Maximum-Likelihood (ML) [96]. The evolutionary distances were computed using the Tamura-Nei method with Gamma distributed model, and the GTR+GAMMA+I model was used to include an estimate of the proportion of invariable sites [97]. The extremely high degree of similarity among the five *S. Typhimurium* genomes makes phylogenetic inference difficult since appropriate phylogenetic markers are hard to find. To avoid any bias of the selected phylogenetic marker, we also constructed a phylogenetic tree based on the number of SNPs across whole genomes excluding phage and replicated regions. The tree based on SNPs is the same as the topologies obtained by NJ and ML methods on whole genomic sequence, which further proves the phylogenetic relationship we have obtained is the best one for *S. Typhimurium* strains.

### Supporting Information

**Figure S1 Distribution of orthologous ORFs in UK-1, LT2, 14028s, D23580, and SL1344.** Each Venn diagram shows the number of genes unique in UK-1 or shared between LT2 and one of the other three *S. Typhimurium* genomes. (TIF)

**Figure S2 Alignment of the genome segment of the five *S. Typhimurium* virulence plasmids.** The region includes

the UK-1 unique deletion adjacent to the operon *spvRABCD*. The sequence alignments were generated in MAUVE. The regions conserved among all genomes were colored in purple and the regions conserved among subsets of the genomes used other colors. If the areas contain sequence elements not aligned, those were marked in white. Regions that were not colored indicate no detectable homology among the five genomes in MAUVE. The predicted genes in these regions are shown with red solid arrays. The names of genes are indicated with the strain name (PUK indicates pSTUK-100, PLT indicates PSLT, 14- indicates the plasmid of 14028s, BT indicates the plasmid of D23580, and SLP indicates plasmid 1 of SL1344) followed by its locus number obtained from each of the annotation files. The putative adhesin gene lost in pSTUK-100 is marked in red in the alignment. (TIF)

**Table S1 Virulence comparison of the UK-1 specific gene mutants with the UK-1 parent in mice.**  
(DOC)

**Table S2 Pseudogenes detected in UK-1.**  
(DOC)

**Table S3 Table of polymorphisms including synonymous and nonsynonymous SNPs detected in the UK-1 strain by referring to the other four genomes.**  
(DOC)

**Table S4 Insertions detected in the UK-1 strain by referring to the other four *S. Typhimurium* strains.**  
(DOC)

**Table S5 43 VNTRs identified in the five *S. Typhimurium* strains.**  
(DOC)

## Acknowledgments

We thank Dr. Jay Hinton for valuable comments on the manuscript and Dr. Lester Hiley for private communication. We also thank Amanda Gonzales for help with phage typing, Robert A. Angus for assistance with the statistical analyses and Erika Arch for editorial help.

## Author Contributions

Conceived and designed the experiments: YL RC. Performed the experiments: YL QK JY AM SW PBE. Analyzed the data: YL QK KR RVJ GG RC. Contributed reagents/materials/analysis tools: YL QK SW KR GG. Wrote the paper: YL KR GG RC.

## References

- CDC (2010) Preliminary FoodNet data on the incidence of infection with pathogens transmitted commonly through food—10 states, 2009. *MMWR Morb Mortal Wkly Rep* 59: 418–422.
- Varma JK, Greene KD, Oviatt J, Barrett TJ, Medalla F, et al. (2005) Hospitalization and antimicrobial resistance in *Salmonella* outbreaks, 1984–2002. *Emerg Infect Dis* 11: 943–946.
- Gordon MA, Banda HT, Gondwe M, Gordon SB, Boeree MJ, et al. (2002) Non-typhoidal salmonella bacteraemia among HIV-infected Malawian adults: high mortality and frequent recrudescence. *AIDS* 16: 1633–1641.
- Gordon MA, Graham SM, Walsh AL, Wilson L, Phiri A, et al. (2008) Epidemics of invasive *Salmonella enterica* serovar enteritidis and *S. enterica* Serovar typhimurium infection associated with multidrug resistance among adults and children in Malawi. *Clin Infect Dis* 46: 963–969.
- Winfield MD, Groisman EA (2003) Role of nonhost environments in the lifestyles of *Salmonella* and *Escherichia coli*. *Appl Environ Microbiol* 69: 3687–3694.
- Jarvik T, Smillie C, Groisman EA, Ochman H (2010) Short-term signatures of evolutionary change in the *Salmonella enterica* serovar typhimurium 14028 genome. *J Bacteriol* 192: 560–567.
- Brussow H, Canchaya C, Hardt WD (2004) Phages and the evolution of bacterial pathogens: from genomic rearrangements to lysogenic conversion. *Microbiol Mol Biol Rev* 68: 560–602.
- Curtiss R, 3rd, Wanda SY, Gunn BM, Zhang X, Tinge SA, et al. (2009) *Salmonella enterica* serovar typhimurium strains with regulated delayed attenuation in vivo. *Infect Immun* 77: 1071–1082.
- Curtiss R, 3rd, Porter SB, Munson M, Tinge SA, Hassan JO, et al. (1991) Nonrecombinant and recombinant avirulent *Salmonella* live vaccines for poultry. In: Blankenship LC, Bailey JS, Cox NA, Craven SE, Meinersmann RJ, et al. editors. *Colonization control of human bacterial enteropathogens in poultry*. San Diego: Academic Press, Inc. 169–198.
- Roland KL, Tinge SA, Killen KP, Kochi SK (2005) Recent advances in the development of live, attenuated bacterial vectors. *Curr Opin Mol Ther* 7: 62–72.
- Barrow PA, Page K, Lovell MA (2001) The virulence for gnotobiotic pigs of live attenuated vaccine strains of *Salmonella enterica* serovars Typhimurium and Enteritidis. *Vaccine* 19: 3432–3436.
- Zhang X, Kelly SM, Bollen W, Curtiss R, 3rd (1999) Protection and immune responses induced by attenuated *Salmonella typhimurium* UK-1 strains. *Microb Pathog* 26: 121–130.
- Covone MG, Brocchi M, Palla E, Dias da Silveira W, Rappuoli R, et al. (1998) Levels of expression and immunogenicity of attenuated *Salmonella enterica* serovar typhimurium strains expressing *Escherichia coli* mutant heat-labile enterotoxin. *Infect Immun* 66: 224–231.
- Hassan JO, Curtiss R, 3rd (1994) Development and evaluation of an experimental vaccination program using a live avirulent *Salmonella typhimurium* strain to protect immunized chickens against challenge with homologous and heterologous *Salmonella* serotypes. *Infect Immun* 62: 5519–5527.
- Hassan JO, Porter SB, Curtiss R, 3rd (1993) Effect of infective dose on humoral immune responses and colonization in chickens experimentally infected with *Salmonella typhimurium*. *Avian Dis* 37: 19–26.
- Hassan JO, Curtiss R (1996) Effect of vaccination of hens with an avirulent strain of *Salmonella typhimurium* on immunity of progeny challenged with wild-type *Salmonella* strains. *Infect Immun* 64: 938–944.
- Hassan JO, Curtiss R (1990) Control of colonization by virulent *Salmonella typhimurium* by oral immunization of chickens with avirulent delta *cya* delta *crp* *S. typhimurium*. *Res Microbiol* 141: 839–850.
- Mohler VL, Heithoff DM, Mahan MJ, Walker KH, Hornitzky MA, et al. (2008) Cross-protective immunity conferred by a DNA adenine methylase deficient *Salmonella enterica* serovar Typhimurium vaccine in calves challenged with *Salmonella* serovar Newport. *Vaccine* 26: 1751–1758.
- Sheoran AS, Sundaram P, Curtiss R (2001) Intranasal immunogenicity of a Deltacya Deltacr-pabA mutant of *Salmonella enterica* serotype Typhimurium for the horse. *Vaccine* 19: 3591–3599.
- McVey DS, Chengappa MM, Mosier DE, Stone GG, Oberst RD, et al. (2002) Immunogenicity of chi4127 phoP- *Salmonella enterica* serovar Typhimurium in dogs. *Vaccine* 20: 1618–1623.
- Gunn BM, Wanda SY, Bursnell D, Wang C, Curtiss R (2010) Construction of recombinant attenuated *Salmonella enterica* serovar typhimurium vaccine vector strains for safety in newborn and infant mice. *Clin Vaccine Immunol* 17: 354–362.
- Shi H, Wang S, Roland KL, Gunn BM, Curtiss R (2010) Immunogenicity of a live recombinant *Salmonella enterica* serovar typhimurium vaccine expressing *pspA* in neonates and infant mice born from naive and immunized mothers. *Clin Vaccine Immunol* 17: 363–371.
- Grassl GA, Finlay BB (2008) Pathogenesis of enteric *Salmonella* infections. *Curr Opin Gastroenterol* 24: 22–26.
- Haraga A, Ohlson MB, Miller SI (2008) *Salmonellae* interplay with host cells. *Nat Rev Microbiol* 6: 53–66.
- McGhie EJ, Brawn LC, Hume PJ, Humphreys D, Koronakis V (2009) *Salmonella* takes control: effector-driven manipulation of the host. *Curr Opin Microbiol* 12: 117–124.
- Tsolis RM, Young GM, Solnick JV, Baumler AJ (2008) From bench to bedside: stealth of enteroinvasive pathogens. *Nat Rev Microbiol* 6: 883–892.
- Jacobsen A, Hendriksen RS, Aarestrup FM, Ussery DW, Friis C (2011) The *Salmonella enterica* Pan-genome. *Microb Ecol* 62: 487–504.
- Tettelin H, Masignani V, Cieslewicz MJ, Donati C, Medini D, et al. (2005) Genome analysis of multiple pathogenic isolates of *Streptococcus agalactiae*: implications for the microbial “pan-genome”. *Proc Natl Acad Sci U S A* 102: 13950–13955.
- Sabbagh SC, Forest CG, Lepage C, Leclerc JM, Daigle F (2010) So similar, yet so different: uncovering distinctive features in the genomes of *Salmonella enterica* serovars Typhimurium and Typhi. *FEMS Microbiol Lett* 305: 1–13.
- McClelland M, Sanderson KE, Spieth J, Clifton SW, Latreille P, et al. (2001) Complete genome sequence of *Salmonella enterica* serovar Typhimurium LT2. *Nature* 413: 852–856.
- Kingsley RA, Msefula CL, Thomson NR, Kariuki S, Holt KE, et al. (2009) Epidemic multiple drug resistant *Salmonella Typhimurium* causing invasive disease in sub-Saharan Africa have a distinct genotype. *Genome Res* 19: 2279–2287.

32. Izumiya H, Sekizuka T, Nakaya H, Taguchi M, Oguchi A, et al. (2011) Whole-genome analysis of *Salmonella enterica* serovar Typhimurium T000240 reveals the acquisition of a genomic island involved in multidrug resistance via IS1 derivatives on the chromosome. *Antimicrob Agents Chemother* 55: 623–630.
33. Luo Y, Kong Q, Yang J, Golden G, Wanda SY, et al. (2011) Complete genome sequence of the universal killer, *Salmonella enterica* serovar Typhimurium UK-1 (ATCC 68169). *J Bacteriol* 193: 4035–4036.
34. Hall N (2007) Advanced sequencing technologies and their wider impact in microbiology. *J Exp Biol* 210: 1518–1525.
35. Lauer P, Rinaudo CD, Soriani M, Margarit I, Maione D, et al. (2005) Genome analysis reveals pili in Group B streptococcus. *Science* 309: 105.
36. Maione D, Margarit I, Rinaudo CD, Masignani V, Mora M, et al. (2005) Identification of a universal Group B streptococcus vaccine by multiple genome screen. *Science* 309: 148–150.
37. Rosqvist R, Skurnik M, Wolf-Watz H (1988) Increased virulence of *Yersinia pseudotuberculosis* by two independent mutations. *Nature* 334: 522–524.
38. Skurnik M, Wolf-Watz H (1989) Analysis of the *yopA* gene encoding the YopI virulence determinants of *Yersinia* spp. *Mol Microbiol* 3: 517–529.
39. Gulig PA, Curtiss R, 3rd (1987) Plasmid-associated virulence of *Salmonella typhimurium*. *Infect Immun* 55: 2891–2901.
40. Porter SB, Tinge SA, Curtiss R (1993) Virulence of *Salmonella typhimurium* mutants for White Leghorn chicks. *Avian Dis* 37: 265–273.
41. Porter SB, Curtiss R, 3rd (1997) Effect of inv mutations on *Salmonella* virulence and colonization in 1-day-old White Leghorn chicks. *Avian Dis* 41: 45–57.
42. Lobry JR (1996) Asymmetric substitution patterns in the two DNA strands of bacteria. *Mol Biol Evol* 13: 660–665.
43. Chan K, Kim CC, Falkow S (2005) Microarray-based detection of *Salmonella enterica* serovar Typhimurium transposon mutants that cannot survive in macrophages and mice. *Infect Immun* 73: 5438–5449.
44. Tatusov RL, Galperin MY, Natale DA, Koonin EV (2000) The COG database: a tool for genome-scale analysis of protein functions and evolution. *Nucleic Acids Res* 28: 33–36.
45. Chaudhuri RR, Peters SE, Pleasance SJ, Northen H, Willers C, et al. (2009) Comprehensive identification of *Salmonella enterica* serovar typhimurium genes required for infection of BALB/c mice. *PLoS Pathog* 5: e1000529.
46. Lawley TD, Chan K, Thompson IJ, Kim CC, Govoni GR, et al. (2006) Genome-wide screen for *Salmonella* genes required for long-term systemic infection of the mouse. *PLoS Pathog* 2: e11.
47. Santiviago CA, Reynolds MM, Porwollik S, Choi SH, Long F, et al. (2009) Analysis of pools of targeted *Salmonella* deletion mutants identifies novel genes affecting fitness during competitive infection in mice. *PLoS Pathog* 5: e1000477.
48. Galan JE, Collmer A (1999) Type III secretion machines: bacterial devices for protein delivery into host cells. *Science* 284: 1322–1328.
49. Galan JE (2001) *Salmonella* interactions with host cells: type III secretion at work. *Annu Rev Cell Dev Biol* 17: 53–86.
50. Hardt WD, Galan JE (1997) A secreted *Salmonella* protein with homology to an avirulence determinant of plant pathogenic bacteria. *Proc Natl Acad Sci U S A* 94: 9887–9892.
51. Liao AP, Petrof EO, Kuppireddi S, Zhao Y, Xia Y, et al. (2008) *Salmonella* type III effector AvrA stabilizes cell tight junctions to inhibit inflammation in intestinal epithelial cells. *PLoS One* 3: e2369.
52. Lange R, Hengge-Aronis R (1994) The *nlpD* gene is located in an operon with *rpoS* on the *Escherichia coli* chromosome and encodes a novel lipoprotein with a potential function in cell wall formation. *Mol Microbiol* 13: 733–743.
53. Fang FC, Libby SJ, Buchmeier NA, Loewen PC, Switala J, et al. (1992) The alternative sigma factor *katF* (*rpoS*) regulates *Salmonella* virulence. *Proc Natl Acad Sci U S A* 89: 11978–11982.
54. Takayanagi Y, Tanaka K, Takahashi H (1994) Structure of the 5' upstream region and the regulation of the *rpoS* gene of *Escherichia coli*. *Mol Gen Genet* 243: 525–531.
55. Hengge-Aronis R (2002) Signal transduction and regulatory mechanisms involved in control of the sigma(S) (*RpoS*) subunit of RNA polymerase. *Microbiol Mol Biol Rev* 66: 373–395, table of contents.
56. Tidhar A, Flashner Y, Cohen S, Levi Y, Zauberman A, et al. (2009) The *NlpD* lipoprotein is a novel *Yersinia pestis* virulence factor essential for the development of plague. *PLoS One* 4: e7023.
57. Benson G (1999) Tandem repeats finder: a program to analyze DNA sequences. *Nucleic Acids Res* 27: 573–580.
58. van Belkum A, Scherer S, van Alphen L, Verbrugh H (1998) Short-sequence DNA repeats in prokaryotic genomes. *Microbiol Mol Biol Rev* 62: 275–293.
59. Vestrepen KJ, Jansen A, Lewitter F, Fink GR (2005) Intragenic tandem repeats generate functional variability. *Nat Genet* 37: 986–990.
60. Moxon ER, Rainey PB, Nowak MA, Lenski RE (1994) Adaptive evolution of highly mutable loci in pathogenic bacteria. *Curr Biol* 4: 24–33.
61. Rodrigue A, Effantin G, Mandrand-Berthelot MA (2005) Identification of *rcnA* (*yohM*), a nickel and cobalt resistance gene in *Escherichia coli*. *J Bacteriol* 187: 2912–2916.
62. Jansen R, Embden JD, Gaastra W, Schouls LM (2002) Identification of genes that are associated with DNA repeats in prokaryotes. *Mol Microbiol* 43: 1565–1575.
63. Mojica FJ, Diez-Villasenor C, Soria E, Juez G (2000) Biological significance of a family of regularly spaced repeats in the genomes of Archaea, Bacteria and mitochondria. *Mol Microbiol* 36: 244–246.
64. Barrangou R, Fremaux C, Deveau H, Richards M, Boyaval P, et al. (2007) CRISPR provides acquired resistance against viruses in prokaryotes. *Science* 315: 1709–1712.
65. Sorek R, Kunin V, Hugenoltz P (2008) CRISPR—a widespread system that provides acquired resistance against phages in bacteria and archaea. *Nat Rev Microbiol* 6: 181–186.
66. Horvath P, Barrangou R (2010) CRISPR/Cas, the immune system of bacteria and archaea. *Science* 327: 167–170.
67. Garneau JE, Dupuis ME, Villion M, Romero DA, Barrangou R, et al. (2010) The CRISPR/Cas bacterial immune system cleaves bacteriophage and plasmid DNA. *Nature* 468: 67–71.
68. Touchon M, Rocha EP (2010) The small, slow and specialized CRISPR and anti-CRISPR of *Escherichia* and *Salmonella*. *PLoS One* 5: e11126.
69. Mojica FJ, Diez-Villasenor C, Garcia-Martinez J, Soria E (2005) Intervening sequences of regularly spaced prokaryotic repeats derive from foreign genetic elements. *J Mol Evol* 60: 174–182.
70. Pourcel C, Salvignol G, Vergnaud G (2005) CRISPR elements in *Yersinia pestis* acquire new repeats by preferential uptake of bacteriophage DNA, and provide additional tools for evolutionary studies. *Microbiology* 151: 653–663.
71. Bolotin A, Quinquis B, Sorokin A, Ehrlich SD (2005) Clustered regularly interspaced short palindromic repeats (CRISPRs) have spacers of extrachromosomal origin. *Microbiology* 151: 2551–2561.
72. Cady KC, O'Toole GA (2011) Non-Identity-Mediated CRISPR-Bacteriophage Interaction Mediated via the *Csy* and *Cas3* Proteins. *J Bacteriol* 193: 3433–3445.
73. Cady KC, White AS, Hammond JH, Abendroth MD, Karthikeyan RS, et al. (2011) Prevalence, conservation and functional analysis of *Yersinia* and *Escherichia* CRISPR regions in clinical *Pseudomonas aeruginosa* isolates. *Microbiology* 157: 430–437.
74. Maurelli AT, Fernandez RE, Bloch CA, Rode CK, Fasano A (1998) “Black holes” and bacterial pathogenicity: a large genomic deletion that enhances the virulence of *Shigella* spp. and enteroinvasive *Escherichia coli*. *Proc Natl Acad Sci U S A* 95: 3943–3948.
75. Rotger R, Casades J (1999) The virulence plasmids of *Salmonella*. *Int Microbiol* 2: 177–184.
76. Garcia-Quintanilla M, Casades J (2011) Virulence plasmid interchange between strains ATCC 14028, LT2, and SL1344 of *Salmonella enterica* serovar Typhimurium. *Plasmid* 65: 169–175.
77. Andrews-Polymenis HL, Baumler AJ, McCormick BA, Fang FC (2010) Taming the elephant: *Salmonella* biology, pathogenesis, and prevention. *Infect Immun* 78: 2356–2369.
78. Corr SC, Li Y, Riedel CU, O'Toole PW, Hill C, et al. (2007) Bacteriocin production as a mechanism for the antimicrobial activity of *Lactobacillus salivarius* UCC118. *Proc Natl Acad Sci U S A* 104: 7617–7621.
79. Kong Q, Six DA, Roland KL, Liu Q, Gu L, et al. (2011) *Salmonella* synthesizing 1-dephosphorylated [corrected] lipopolysaccharide exhibits low endotoxic activity while retaining its immunogenicity. *Journal of Immunology* 187: 412–423.
80. Anderson ES, Ward LR, Saxe MJ, de Sa JD (1977) Bacteriophage-typing designations of *Salmonella typhimurium*. *J Hyg (Lond)* 78: 297–300.
81. Kong Q, Six DA, Roland KL, Liu Q, Gu L, et al. (2011) *Salmonella* synthesizing 1-dephosphorylated [corrected] lipopolysaccharide exhibits low endotoxic activity while retaining its immunogenicity. *J Immunol* 187: 412–423.
82. Bertani G (1951) Studies on lysogenesis. I. The mode of phage liberation by lysogenic *Escherichia coli*. *J Bacteriol* 62: 293–300.
83. Hamilton MA, Russo RC, Thurston RV (1977) Trimmed Spearman-Kärber method for estimating median lethal concentrations in toxicity bioassays. *Environ Sci Technol* 11: 714–719.
84. Gotoh O (2008) A space-efficient and accurate method for mapping and aligning cDNA sequences onto genomic sequence. *Nucleic Acids Res* 36: 2630–2638.
85. Altschul SF, Gish W, Miller W, Myers EW, Lipman DJ (1990) Basic local alignment search tool. *J Mol Biol* 215: 403–410.
86. Edgar RC (2004) MUSCLE: a multiple sequence alignment method with reduced time and space complexity. *BMC Bioinformatics* 5: 113.
87. Kurtz S, Phillippy A, Delcher AL, Smoot M, Shumway M, et al. (2004) Versatile and open software for comparing large genomes. *Genome Biol* 5: R12.
88. Nei M, Gojobori T (1986) Simple methods for estimating the numbers of synonymous and nonsynonymous nucleotide substitutions. *Mol Biol Evol* 3: 418–426.
89. Johnson AD, Handsaker RE, Pulit SL, Nizzari MM, O'Donnell CJ, et al. (2008) SNAP: a web-based tool for identification and annotation of proxy SNPs using HapMap. *Bioinformatics* 24: 2938–2939.
90. Grissa I, Vergnaud G, Pourcel C (2007) CRISPRFinder: a web tool to identify clustered regularly interspaced short palindromic repeats. *Nucleic Acids Res* 35: W52–57.
91. Haft DH, Selengut J, Mongodin EF, Nelson KE (2005) A guild of 45 CRISPR-associated (Cas) protein families and multiple CRISPR/Cas subtypes exist in prokaryotic genomes. *PLoS Comput Biol* 1: e60.
92. Eddy SR (2009) A new generation of homology search tools based on probabilistic inference. *Genome Inform* 23: 205–211.
93. Darling AC, Mau B, Blattner FR, Perna NT (2004) Mauve: multiple alignment of conserved genomic sequence with rearrangements. *Genome Res* 14: 1394–1403.

94. Castresana J (2000) Selection of conserved blocks from multiple alignments for their use in phylogenetic analysis. *Mol Biol Evol* 17: 540–552.
95. Kumar S, Nei M, Dudley J, Tamura K (2008) MEGA: a biologist-centric software for evolutionary analysis of DNA and protein sequences. *Brief Bioinform* 9: 299–306.
96. Stamatakis A (2006) RAxML-VI-HPC: maximum likelihood-based phylogenetic analyses with thousands of taxa and mixed models. *Bioinformatics* 22: 2688–2690.
97. Tamura K, Nei M (1993) Estimation of the number of nucleotide substitutions in the control region of mitochondrial DNA in humans and chimpanzees. *Mol Biol Evol* 10: 512–526.
98. Langille MG, Brinkman FS (2009) IslandViewer: an integrated interface for computational identification and visualization of genomic islands. *Bioinformatics* 25: 664–665.
99. Ghai R, Hain T, Chakraborty T (2004) GenomeViz: visualizing microbial genomes. *BMC Bioinformatics* 5: 198.
